# Supplementary material for: Trace detection of nitro aromatic explosives by highly fluorescent g-C3N4 nanosheets
Source: Royal Society of Chemistry journal article supplement (doi:10.1039/c4an01693a), 2014-10-14
Supplement: c4an01693a1.pdf [file c4an01693a1.pdf]

## Supplementary Information

# Trace detection of nitro aromatic explosives by highly fluorescent g-C<sub>3</sub>N<sub>4</sub> nanosheets

Hai-Yu Chen,<sup>a</sup> Lin-Wei Ruan,<sup>a</sup> Xia Jiang,<sup>a</sup> Ling-Guang Qiu,<sup>a, \*</sup>

<sup>a</sup> *Laboratory of Advanced Porous Materials, School of Chemistry and Chemical Engineering,  
Anhui University, Hefei 230601, China.*

---

\*Corresponding author:

Fax: +86 551 65108212; Tel: +86 551 65108212;

E-mail: [ahulgqiu@126.com](mailto:ahulgqiu@126.com)(L. G. Qiu).

## THF content determination

The influence of THF on emission properties of the nanosheets was investigated with changing the THF content, as shown in Fig.S1. The emission peak was centre at 433.8 nm at an excitation wavelength of 308 nm, and the concentration of THF has a remarkable effect on emission intensity. It was obvious that when the suspension containing 50 vol.% THF, the effect on emission intensity is least, which is only about 2.7% emission intensity decreased. Therefore, 50 vol. % THF was used throughout the experiments for NACs detection.

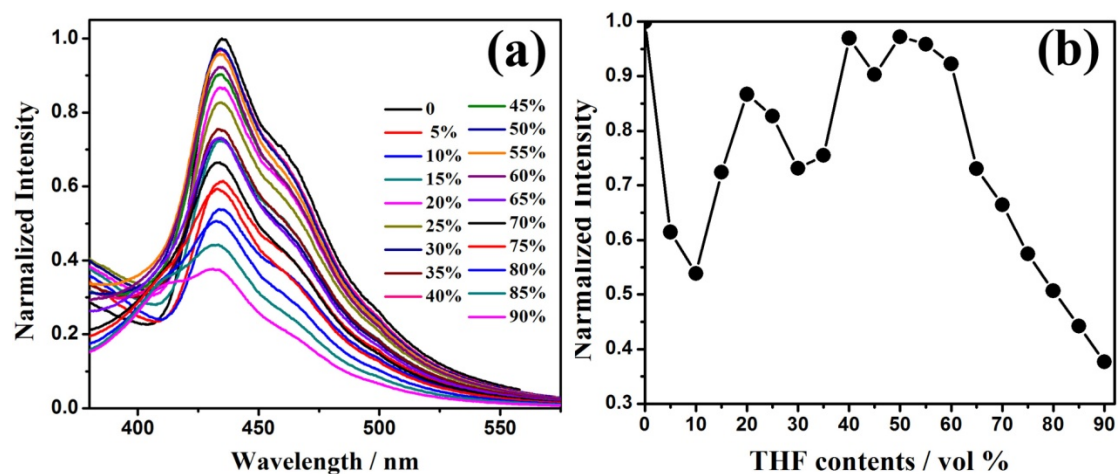

**Fig. S1** (a) Emission fluorescence spectra and (b) emission intensity of g-C<sub>3</sub>N<sub>4</sub> nanosheets suspension with various amount of THF.

## Quantum Yield (QY) Measurements

Rhodamine B in distilled water (literature<sup>S1</sup> quantum yield 0.31) was selected as a control standard. The QY of g-C<sub>3</sub>N<sub>4</sub> nanosheet was estimated according to the follow equation 1:

$$\Phi = \Phi_r \times \frac{I}{A} \times \frac{A_r}{I_r} \times \frac{n^2}{n_r^2} \quad (1)$$

Where  $\Phi$  is the QY,  $I$  is the integrated PL emission intensity (excited at 308 nm for g-C<sub>3</sub>N<sub>4</sub> nanosheet and Rhodamine B),  $n$  is the refractive index (1.334 for distilled water), and  $A$  is the absorbance value at the excitation wavelength of 308 nm (distilled water) (less than 0.1). The subscript “r” refers to the standards.

**Table S1.** QY of g-C<sub>3</sub>N<sub>4</sub> nanosheet dispersed in distilled water.

| Sample                                    | Integrated emission intensity ( <i>I</i> ) | Abs. nm ( <i>A</i> ) | Refractive index of solvent ( <i>n</i> ) | QY ( $\Phi$ ) |
|-------------------------------------------|--------------------------------------------|----------------------|------------------------------------------|---------------|
| Rhodamine B                               | 46209                                      | 0.0575               | 1.334 (distilled water)                  | 0.31          |
| g-C <sub>3</sub> N <sub>4</sub> nanosheet | 59978                                      | 0.0713               | 1.334 (distilled water)                  | 0.32          |

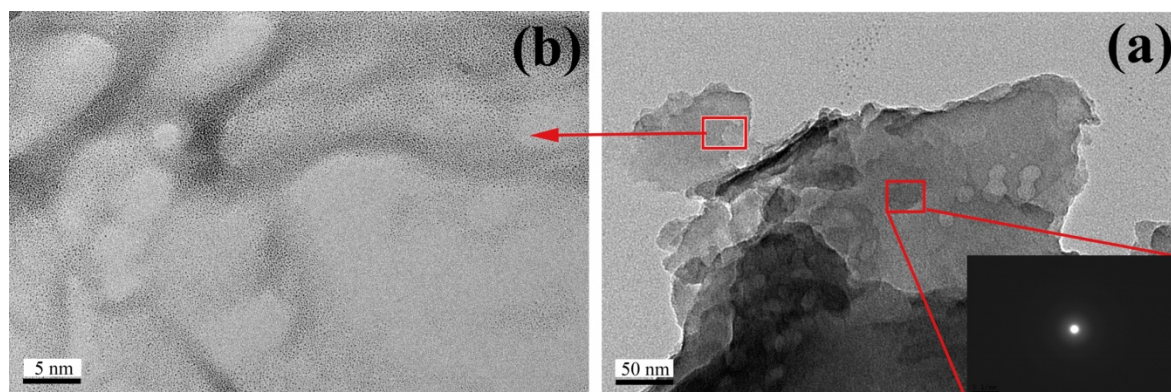

**Fig. S2** High-resolution TEM (HRTEM) patterns of the obtained g-C<sub>3</sub>N<sub>4</sub> nanosheets, and the inset is the selected-area electron diffraction (SAED).

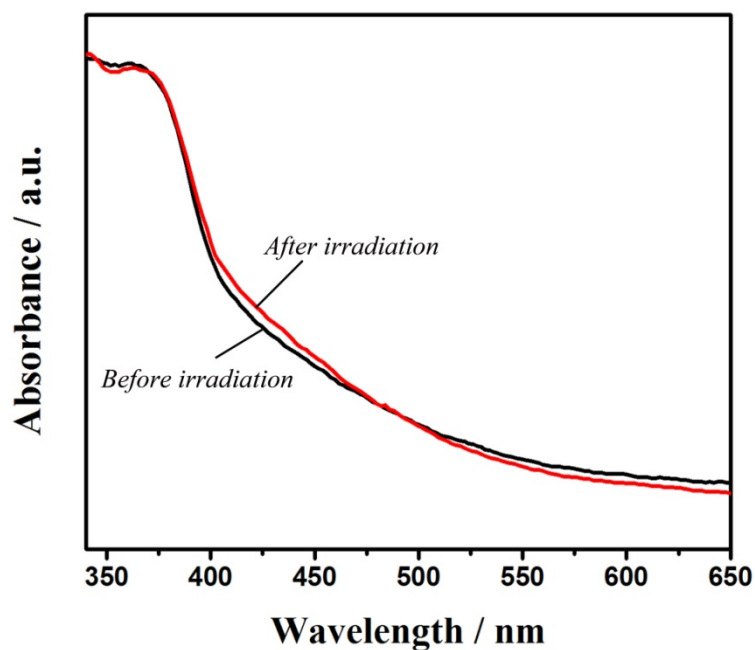

**Fig. S3** UV-vis absorption spectra of the obtained nanosheet before and after irradiation. (A light irradiation system containing a Xe-lamp (XQ-500W, Shanghai, China) was used)

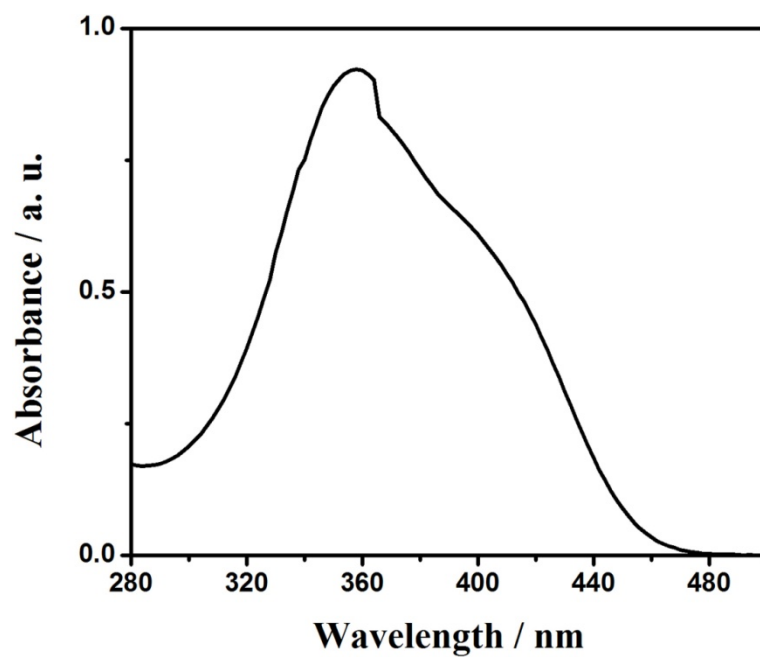

**Fig. S4** UV-vis absorption spectrum of 2,4,6-Trinitrophenol (PA).

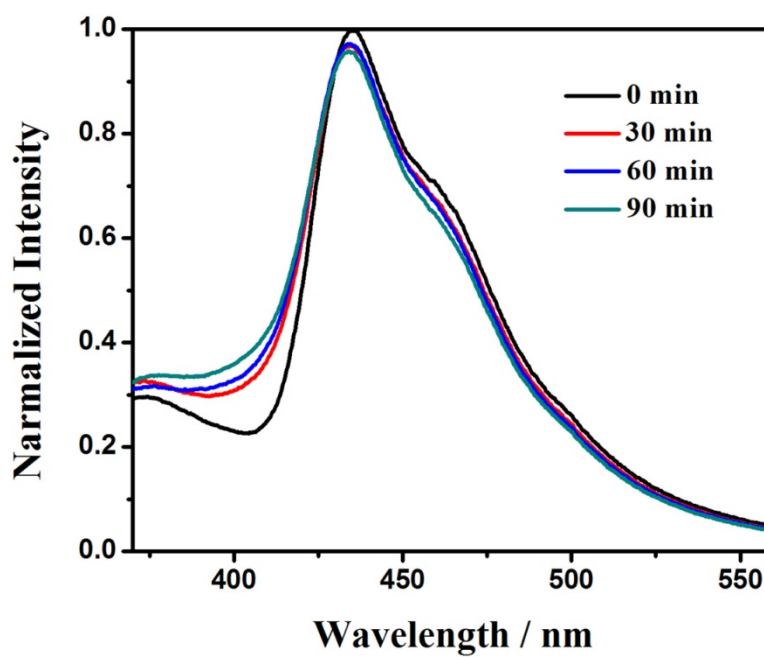

**Fig. S5.** Time resolved fluorescence of the g-C<sub>3</sub>N<sub>4</sub> nanosheet (excited at 308 nm).

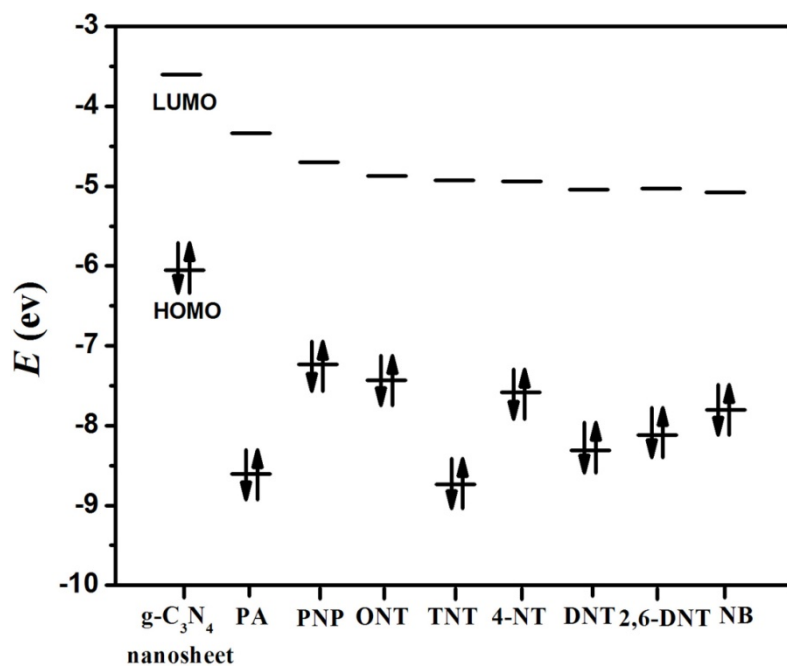

**Fig. S6** HOMO and LUMO energy of the detected nitro aromatic explosives.

### References in Supporting Information:

[S1] D. Magde, G. E. Rojas and P. G. Seybold, *Photochem. Photobiol.* 1999, **70**, 737-744.
